# Supplementary material for: Utilising sigmoid models to predict the spread of antimicrobial resistance at the country level
Source: PubMed Central journal article supplement (PMC7403637; doi:10.2807/1560-7917.es.2020.25.23.1900387), 2020-06-11
Supplement: 19-00387_FALLACH_Supplement.pdf [file 19-00387_FALLACH_Supplement.pdf]

## Supplementary material for Fallach *et al.*, "Utilising sigmoid models to predict the spread of antimicrobial resistance at the country level"

This supplementary material is hosted by Eurosurveillance as supporting information alongside the article "Utilising sigmoid models to predict the spread of antimicrobial resistance at the country level" on behalf of the authors, who remain responsible for the accuracy and appropriateness of the content. The same standards for ethics, copyright, attributions and permissions as for the article apply. Supplements are not edited by Eurosurveillance and the journal is not responsible for the maintenance of any links or email addresses provided therein.

**Table S1: Summary of data included in each database**

| Database name (sponsor)                    | AESOP, EnSOP (Australian Group on Antimicrobial Resistance) | CDDEP                      | EARS-Net (ECDC) | TEST (Pfizer) | MYSTIC (AstraZeneca)  |
|--------------------------------------------|-------------------------------------------------------------|----------------------------|-----------------|---------------|-----------------------|
| <b>Observations</b>                        | 7833                                                        | 2134                       | 8298            | 313596        | 122386                |
| <b>Years</b>                               | 2013                                                        | Specific                   | Specific        | 2004-2014     | 1997, 1999, 2000-2007 |
| <b>Country</b>                             | Australia                                                   | Global                     | Europe          | Global        | Global                |
| <b>N. Bacteria</b>                         | 19                                                          | 10                         | 8               | 18            | 29                    |
| <b>N. Antibiotics</b>                      | 35                                                          | 10                         | 10              | 19            | 24                    |
| <b>Age</b>                                 | Not specified                                               | Not specified              | Not specified   | Available     | Available             |
| <b>Specimen source</b>                     | Blood                                                       | Blood, CSF                 | Blood, CSF      | Various       | Various               |
| <b>Date collected</b>                      | Exact                                                       | Year                       | Year            | Exact         | Exact                 |
| <b>Patient population</b>                  | Inpatients                                                  | Inpatients and outpatients | Inpatients      | Inpatients    | Inpatients            |
| <b>Acquisition (hospital or community)</b> | Specified                                                   | Not specified              | Not specified   | Not specified | Not specified         |

**Figure S2: Graphical presentation of *E.coli* resistance to 3<sup>rd</sup>-generation cephalosporins at the country level, by model type**

Some graphs that appear linear (for example, South Africa) have been classified as sigmoid. As seen in Supplementary Table S4, the  $R^2$  was higher for the sigmoid model than for the linear model.

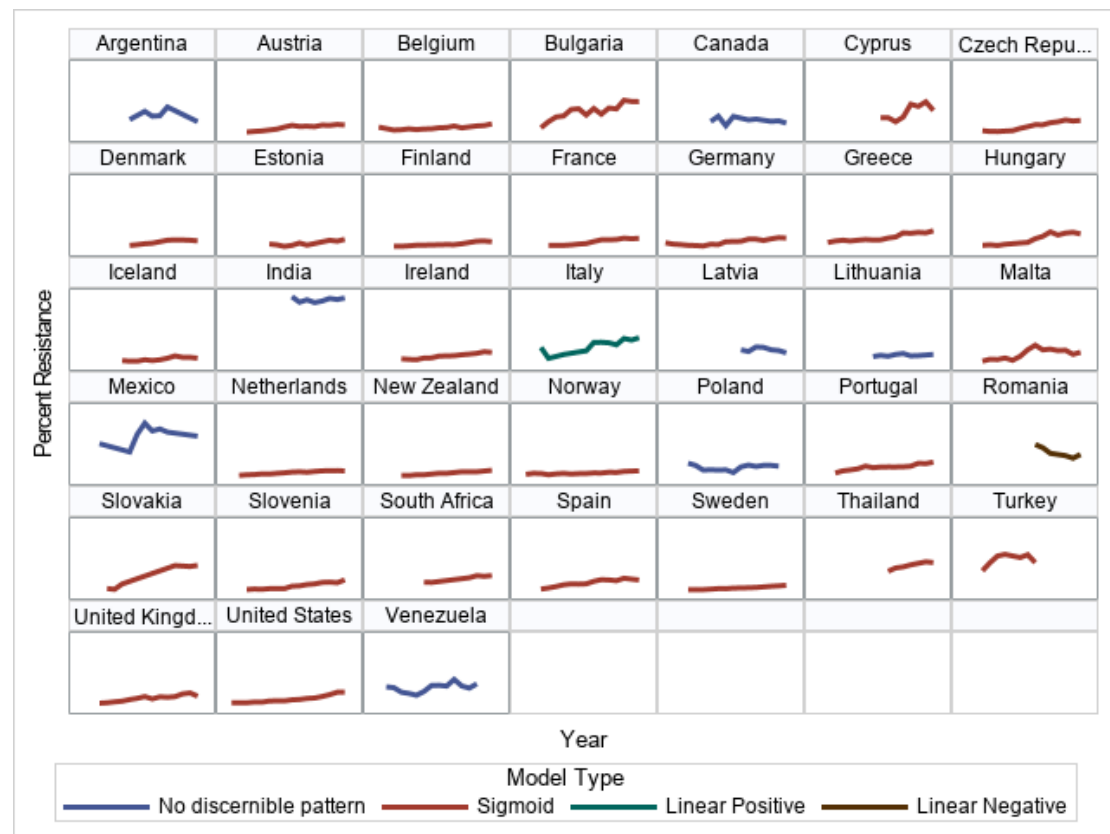

**Table S3: *E.coli* resistance to 3<sup>rd</sup>-generation cephalosporins at the country level: comparison of R<sup>2</sup> for the sigmoid and linear models**

In 3 cases (Bulgaria, New Zealand and Portugal) the R<sup>2</sup> for the linear model was slightly higher than for the sigmoid model, but we determined *a priori* that any country whose sigmoid model had an R<sup>2</sup> greater than 0.7 would be classified as sigmoid.

| Country        | Model Type             | Sigmoid R <sup>2</sup> | Linear R <sup>2</sup> |
|----------------|------------------------|------------------------|-----------------------|
| Argentina      | No discernible pattern |                        |                       |
| Austria        | Sigmoid                | 0.95                   | 0.86                  |
| Belgium        | Sigmoid                | 0.76                   | 0.13                  |
| Bulgaria       | Sigmoid                | 0.78                   | 0.79                  |
| Canada         | No discernible pattern |                        |                       |
| Cyprus         | Sigmoid                | 0.84                   | 0.55                  |
| Czech Republic | Sigmoid                | 0.98                   | 0.93                  |
| Denmark        | Sigmoid                | 0.96                   | 0.80                  |
| Estonia        | Sigmoid                | 0.83                   | 0.65                  |
| Finland        | Sigmoid                | 0.93                   | 0.89                  |
| France         | Sigmoid                | 0.99                   | 0.93                  |
| Germany        | Sigmoid                | 0.88                   | 0.69                  |
| Greece         | Sigmoid                | 0.95                   | 0.89                  |
| Hungary        | Sigmoid                | 0.97                   | 0.88                  |
| Iceland        | Sigmoid                | 0.86                   | 0.68                  |
| India          | No discernible pattern |                        |                       |
| Ireland        | Sigmoid                | 0.96                   | 0.95                  |
| Italy          | Linear Positive        |                        | 0.74                  |
| Latvia         | No discernible pattern |                        |                       |
| Lithuania      | No discernible pattern |                        |                       |
| Malta          | Sigmoid                | 0.83                   | 0.49                  |
| Mexico         | No discernible pattern |                        |                       |
| Netherlands    | Sigmoid                | 0.97                   | 0.95                  |
| New Zealand    | Sigmoid                | 0.97                   | 0.98                  |
| Norway         | Sigmoid                | 0.90                   | 0.76                  |
| Poland         | No discernible pattern |                        |                       |
| Portugal       | Sigmoid                | 0.83                   | 0.86                  |
| Romania        | Linear Negative        |                        | 0.75                  |
| Slovakia       | Sigmoid                | 0.99                   | 0.96                  |
| Slovenia       | Sigmoid                | 0.97                   | 0.94                  |
| South Africa   | Sigmoid                | 0.99                   | 0.10                  |
| Spain          | Sigmoid                | 0.98                   | <0.01                 |
| Sweden         | Sigmoid                | 0.98                   | 0.97                  |
| Thailand       | Sigmoid                | 0.98                   | 0.92                  |
| Turkey         | Sigmoid                | 0.77                   | 0.21                  |
| United Kingdom | Sigmoid                | 0.87                   | 0.85                  |
| United States  | Sigmoid                | 0.98                   | 0.89                  |
| Venezuela      | No discernible pattern |                        |                       |

**Table S4: List of countries belonging to each rate of resistance spread, by bacterium-antibiotic pair**

| Bacterium                      | Antibiotic class | Rate of resistance spread | Countries                                                                                                                                                                                                                                         |
|--------------------------------|------------------|---------------------------|---------------------------------------------------------------------------------------------------------------------------------------------------------------------------------------------------------------------------------------------------|
| <i>Acinetobacter baumannii</i> | Carbapenem       | Slow                      | France, United States                                                                                                                                                                                                                             |
|                                |                  | Intermediate              | Italy, Venezuela                                                                                                                                                                                                                                  |
|                                |                  | Fast                      | Mexico                                                                                                                                                                                                                                            |
|                                | Cephalosporins 3 | Intermediate              | France, United States, Venezuela                                                                                                                                                                                                                  |
|                                |                  | Fast                      | Mexico                                                                                                                                                                                                                                            |
| <i>Enterobacter</i>            | Carbapenem       | Slow                      | Canada, United States                                                                                                                                                                                                                             |
|                                |                  | Intermediate              | Thailand, Venezuela                                                                                                                                                                                                                               |
| <i>Enterococcus faecium</i>    | Aminoglycosides  | Slow                      | Austria, Italy                                                                                                                                                                                                                                    |
|                                |                  | Intermediate              | Netherlands, Sweden                                                                                                                                                                                                                               |
|                                |                  | Fast                      | Czech Republic, Spain                                                                                                                                                                                                                             |
|                                | Glycopeptide     | Slow                      | Austria, Denmark, Norway                                                                                                                                                                                                                          |
|                                |                  | Intermediate              | Hungary, Ireland                                                                                                                                                                                                                                  |
|                                |                  | Fast                      | Venezuela                                                                                                                                                                                                                                         |
|                                | PNC              | Slow                      | Austria, Norway, Spain, Sweden                                                                                                                                                                                                                    |
|                                |                  | Intermediate              | Czech Republic                                                                                                                                                                                                                                    |
|                                |                  | Fast                      | France, Netherlands                                                                                                                                                                                                                               |
| <i>Escherichia coli</i>        | Aminoglycosides  | Slow                      | Argentina, Austria, Belgium, Czech Republic, Denmark, Finland, France, Hungary, Ireland, New Zealand, Portugal, Slovakia, Slovenia, Spain, Sweden, Thailand, United Kingdom                                                                       |
|                                |                  | Intermediate              | Estonia, Greece, Iceland, Italy, Luxembourg                                                                                                                                                                                                       |
|                                |                  | Fast                      | Cyprus, India, Romania, South Africa, Turkey                                                                                                                                                                                                      |
|                                | Cephalosporins 3 | Slow                      | Belgium, Finland, Germany, Ireland, Netherlands, New Zealand, Norway, Portugal, Slovenia, Spain, Sweden, United Kingdom, United States                                                                                                            |
|                                |                  | Intermediate              | Austria, Bulgaria, Czech Republic, Denmark, Estonia, France, Greece, Iceland                                                                                                                                                                      |
|                                |                  | Fast                      | Cyprus, Hungary, Malta, Slovakia, South Africa, Thailand, Turkey                                                                                                                                                                                  |
|                                | PNC              | Slow                      | Belgium, Czech Republic, France, Italy, Poland, Spain, United Kingdom, United States                                                                                                                                                              |
|                                |                  | Intermediate              | Argentina, Austria, Ireland, Malta                                                                                                                                                                                                                |
|                                |                  | Fast                      | Portugal, South Africa                                                                                                                                                                                                                            |
|                                | PNC/Bli          | Slow                      | Belgium, Germany, Spain, Thailand, United States                                                                                                                                                                                                  |
|                                |                  | Intermediate              | Italy, Mexico                                                                                                                                                                                                                                     |
|                                |                  | Fast                      | India, South Africa, Turkey                                                                                                                                                                                                                       |
|                                | Quinolone        | Slow                      | Austria, Bulgaria, Czech Republic, Denmark, Estonia, Finland, France, Germany, Greece, Hungary, Ireland, Italy, Luxembourg, Netherlands, New Zealand, Norway, Poland, Slovenia, Spain, Sweden, Thailand, United Kingdom, United States, Venezuela |
|                                |                  | Intermediate              | Lithuania, Portugal, South Africa, Turkey                                                                                                                                                                                                         |

|                                 |                  |                  |                                                                                                                             |
|---------------------------------|------------------|------------------|-----------------------------------------------------------------------------------------------------------------------------|
|                                 |                  | Fast             | Argentina, Cyprus, Malta, Slovakia                                                                                          |
| <i>Klebsiella pneumoniae</i>    | Aminoglycosides  | Slow             | Belgium, Canada, Croatia, Czech Republic, Denmark, Finland, France, Hungary, New Zealand, Portugal, Slovenia, Spain, Sweden |
|                                 |                  | Intermediate     | Argentina, Bulgaria, Greece, Italy, Malta, South Africa                                                                     |
|                                 |                  | Fast             | India, Poland                                                                                                               |
|                                 | Carbapenem       | Slow             | Belgium, Hungary, Spain, Thailand                                                                                           |
|                                 |                  | Intermediate     | Argentina, Greece, United States, Venezuela                                                                                 |
|                                 |                  | Fast             | India, Italy                                                                                                                |
|                                 | Cephalosporins 3 | Slow             | Netherlands, New Zealand, Spain, Sweden, United States                                                                      |
|                                 |                  | Intermediate     | Austria, France, South Africa                                                                                               |
|                                 |                  | Fast             | Bulgaria, Croatia, Czech Republic, Greece, Ireland, Italy, Malta, Portugal, Slovenia, Thailand                              |
|                                 | PNC/Bli          | Slow             | Belgium, United States                                                                                                      |
|                                 |                  | Intermediate     | Mexico, New Zealand, Spain                                                                                                  |
|                                 |                  | Fast             | France, Italy, South Africa                                                                                                 |
|                                 | Quinolone        | Slow             | France, Mexico, Slovenia, Spain                                                                                             |
|                                 |                  | Intermediate     | Austria, Greece, Italy, Malta, Portugal                                                                                     |
|                                 |                  | Fast             | Czech Republic, Hungary, South Africa, Thailand                                                                             |
| MRSA                            | Oxacilin         | Slow             | Finland                                                                                                                     |
|                                 |                  | Intermediate     | Canada, Czech Republic, Hungary, Portugal, Romania, Slovakia                                                                |
|                                 |                  | Fast             | Venezuela                                                                                                                   |
| <i>Pseudomonas aeruginosa</i>   | Carbapenem       | Slow             | Hungary, Spain                                                                                                              |
|                                 |                  | Intermediate     | France, Greece, Mexico, Poland, Slovenia, Sweden, Venezuela                                                                 |
|                                 | Piperacillin/taz | Slow             | Norway, Portugal, Sweden, United Kingdom                                                                                    |
|                                 |                  | Intermediate     | Austria, Ireland                                                                                                            |
|                                 |                  | Fast             | Belgium, Italy, Slovenia                                                                                                    |
|                                 | Quinolone        | Slow             | Portugal                                                                                                                    |
| Intermediate                    |                  | Spain, Venezuela |                                                                                                                             |
| Fast                            |                  | Mexico           |                                                                                                                             |
| <i>Staphylococcus aureus</i>    | Rifampicin       | Slow             | Malta, Slovakia                                                                                                             |
|                                 |                  | Intermediate     | Bulgaria, Lithuania                                                                                                         |
|                                 |                  | Fast             | Finland, Portugal                                                                                                           |
| <i>Streptococcus pneumoniae</i> | Macrolide        | Slow             | Finland, Ireland, United States, Venezuela                                                                                  |
|                                 | PNC              | Slow             | Denmark, Finland, Norway, Sweden                                                                                            |
|                                 |                  | Intermediate     | Germany, Ireland                                                                                                            |

**Figure S5: Average models of rise in resistance over time for the three categories of *E.coli* resistance to 3<sup>rd</sup>-generation cephalosporins**

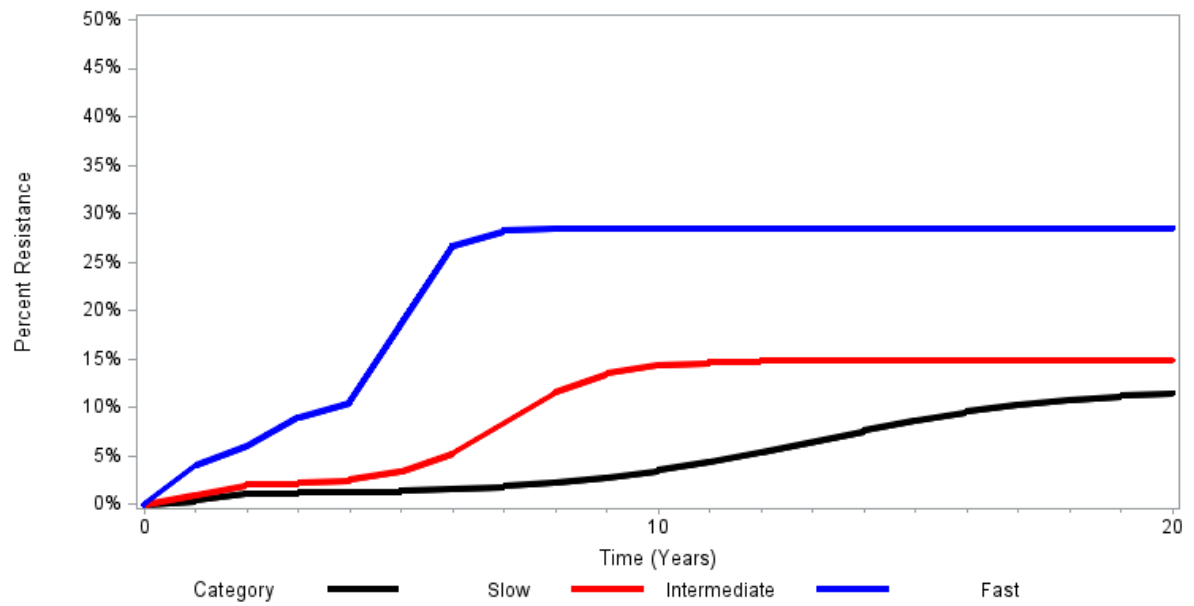

**Figures S6 a-d: Average model with confidence intervals and individual country graphs**

Grey dashed lines represent observed resistance rate over time. Black dots represent predicted resistance rate, with interval bars showing the CI of prediction. All individual country lines were calibrated to a numeric scale for comparison, each unit presenting 1 year.

**a. *E.coli* resistance to 3<sup>rd</sup>-generation cephalosporins with intermediate pace (comparison of average model to observed data from 7 countries)**

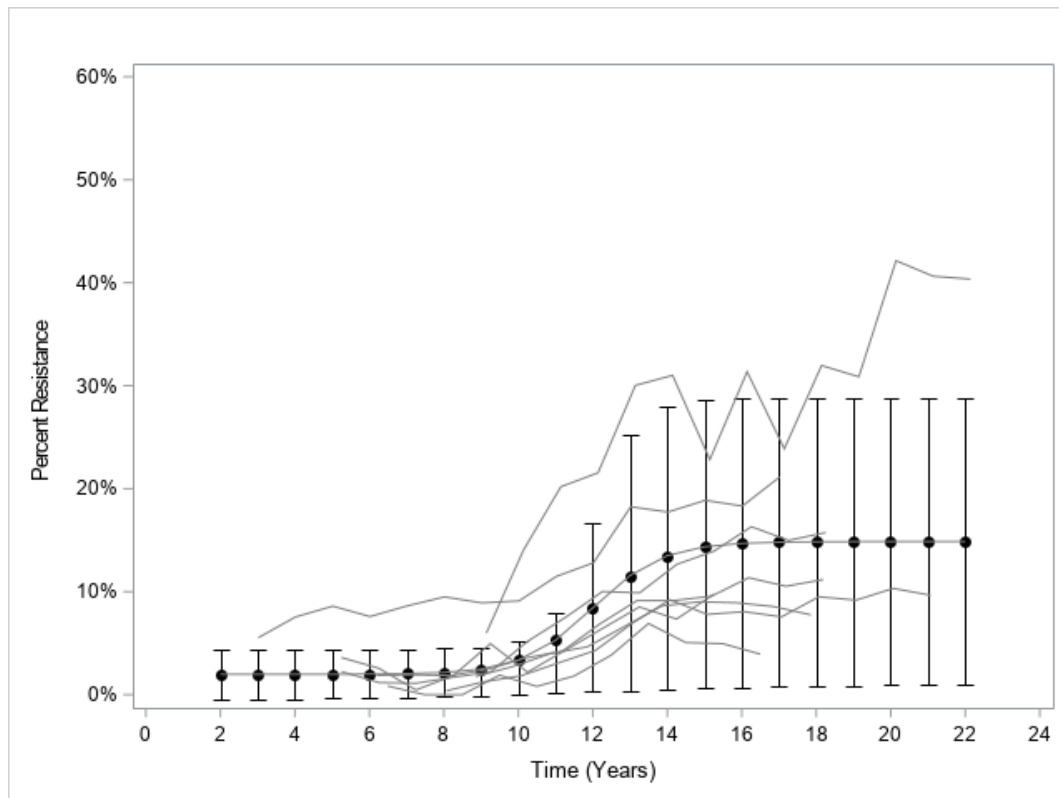

- b. *E.coli* resistance to 3<sup>rd</sup>-generation cephalosporins with fast pace (comparison of average model to observed data from 7 countries)

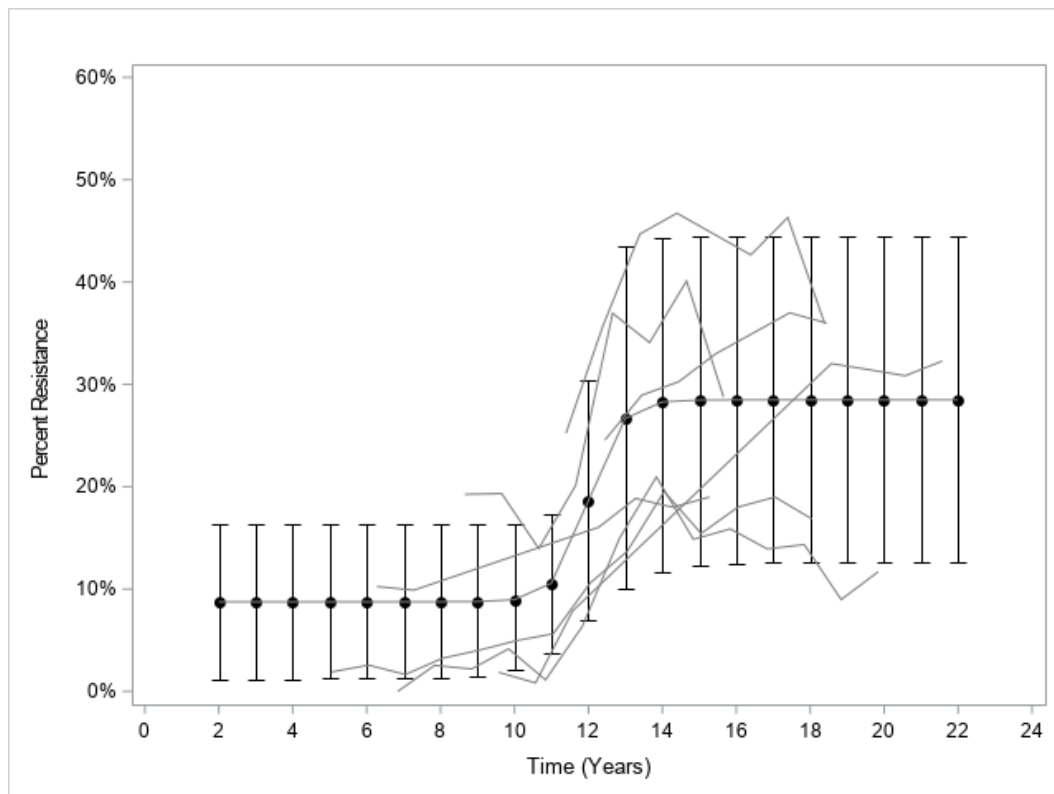

- c. *Klebsiella Pneumonia* resistance carbapenems with slow pace (comparison of average model to observed data from 5 countries)

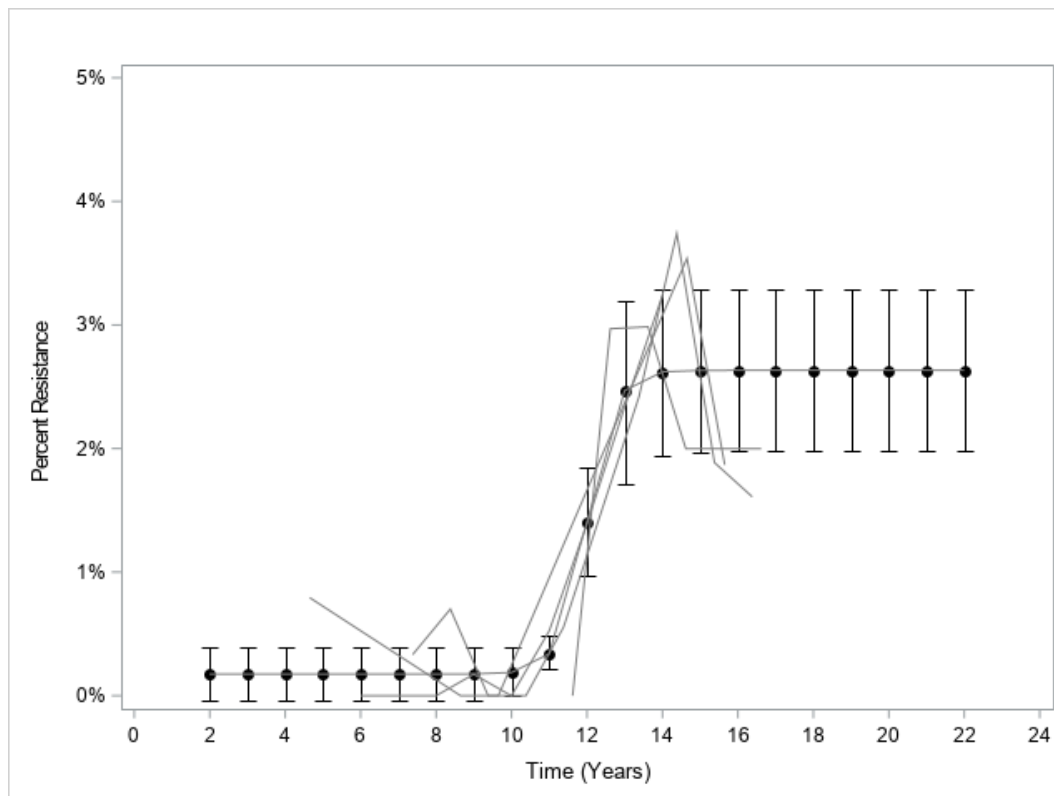



d. MRSA with intermediate pace (comparison of average model to observed data from 6 countries)

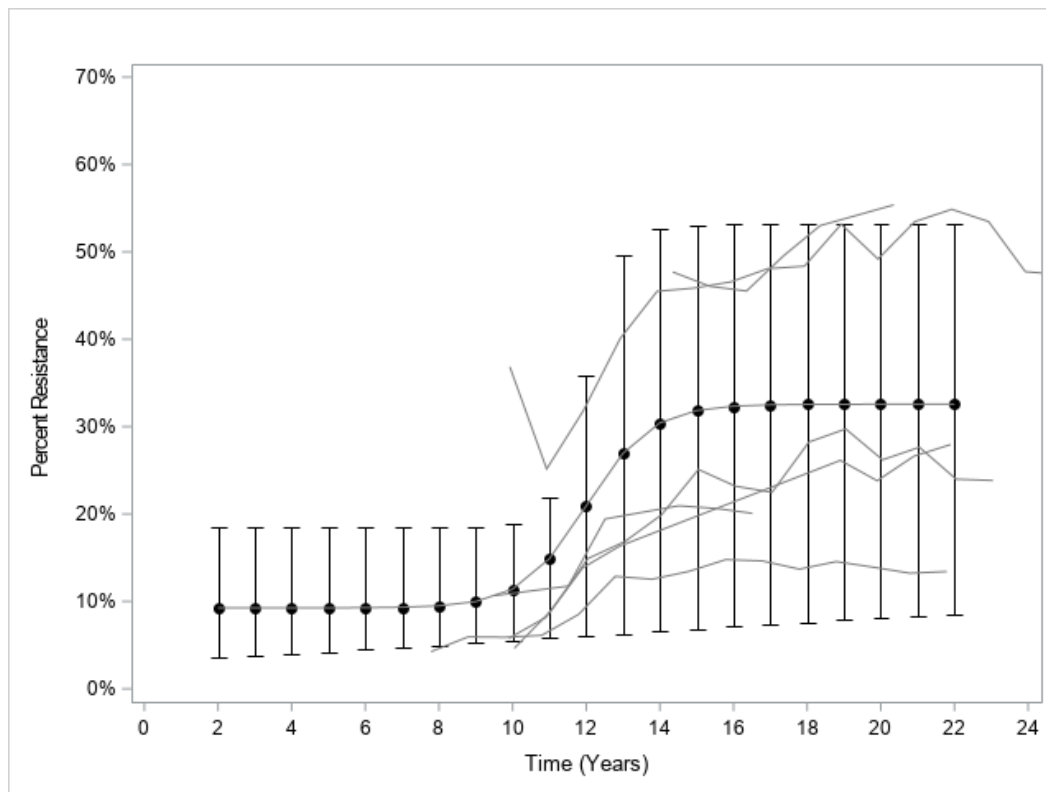

Table S7: Absolute difference between observed and predicted proportion of resistance

| Rate of resistance spread | 25 <sup>th</sup> percentile | Median | 75 <sup>th</sup> percentile | N    |
|---------------------------|-----------------------------|--------|-----------------------------|------|
| Slow                      | 2.0%                        | 4.1%   | 8.0%                        | 785  |
| Intermediate              | 5.3%                        | 10.2%  | 18.5%                       | 373  |
| Fast                      | 7.7%                        | 13.5%  | 20.6%                       | 223  |
| All                       | 2.8%                        | 6.5%   | 12.6%                       | 1381 |
